# Supplementary material
Source: PubMed Central journal article supplement (PMC9793320)

## Supplemental Information

### Immune response and homeostasis mechanism following administration of BBIBP-CorV SARS-CoV-2 inactivated vaccine

Jianhua Yin, Yingze Zhao, Fubaoqian Huang, Yunkai Yang, Yaling Huang, Zhenkun Zhuang, Yanxia Wang, Zhifeng Wang, Xiumei Lin, Yuhui Zheng, Wenwen Zhou, Shuo Wang, Ziqian Xu, Beiwei Ye, Yaxin Guo, Wenwen Lei, Lei Li, Jinmin Tian, Jinxian Gan, Hui Wang, Wei Wang, Peiyao Ma, Chang Liu, Xiaoyu Wei, Xuyang Shi, Zifei Wang, Yang Wang, Ying Liu, Mingming Yang, Yue Yuan, Yumo Song, Wen Ma, Zhuoli Huang, Ya Liu, Yunting Huang, Haorong Lu, Peipei Liu, Hao Liang, Yong Hou, Xun Xu, Longqi Liu, Yuntao Zhang, Guizhen Wu, George F. Gao, Xin Jin, Chuanyu Liu, Xiaoming Yang, and William J. Liu

# Supplemental Figure 1

## A

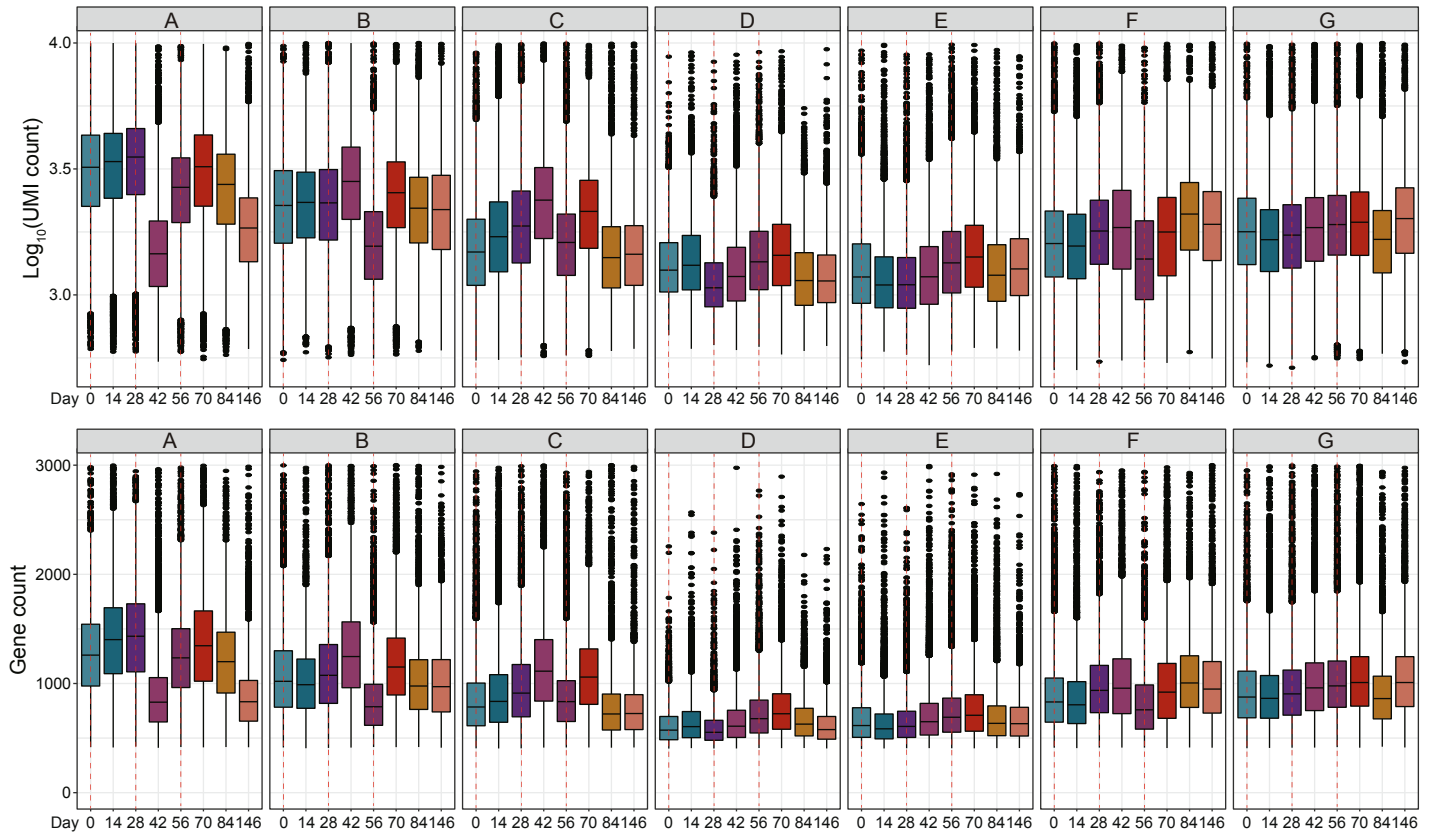

## B

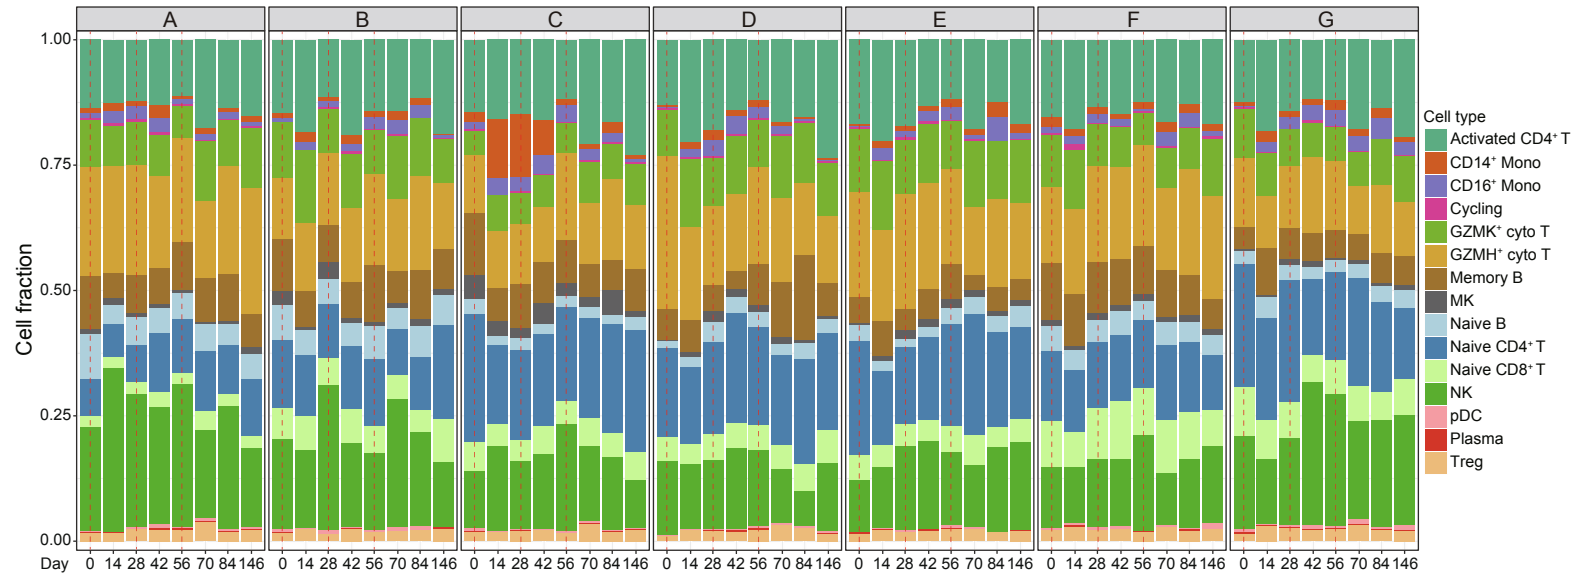

## C

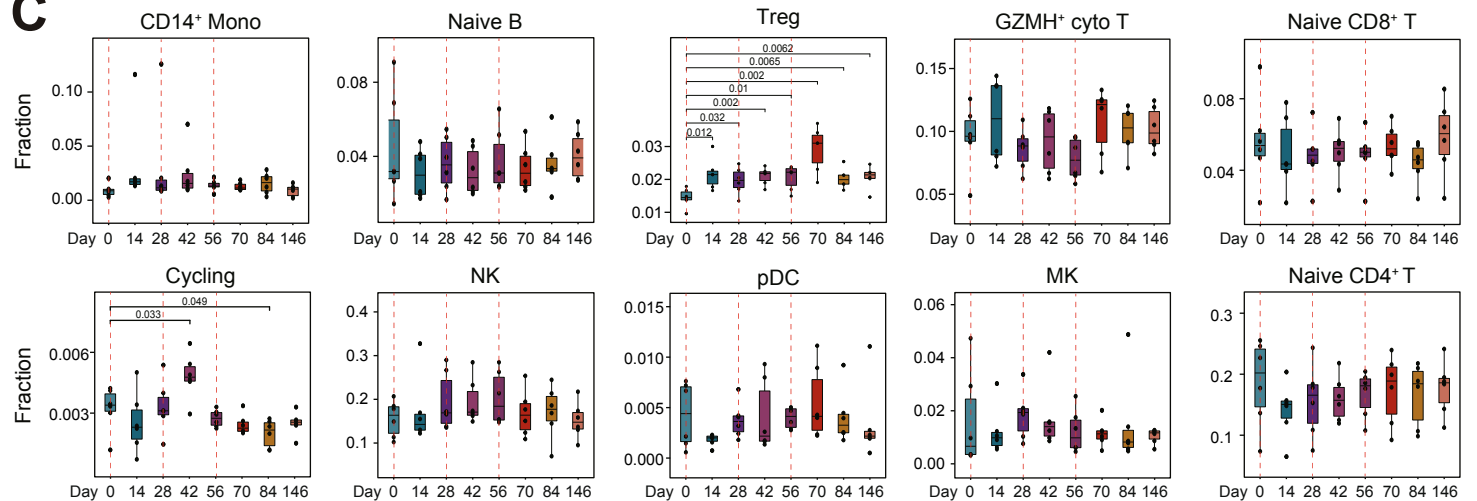

# Supplemental Figure 2

**A**

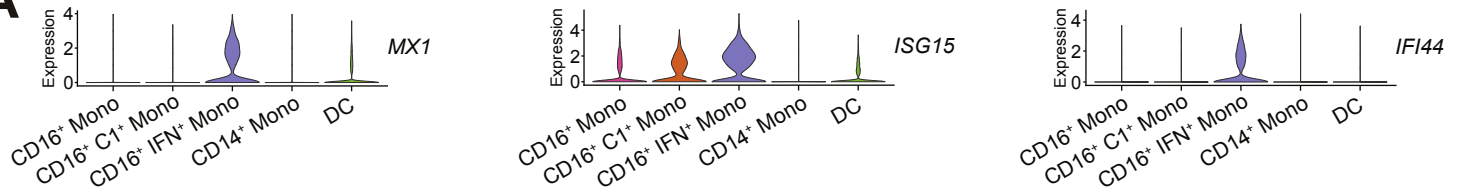

**B**

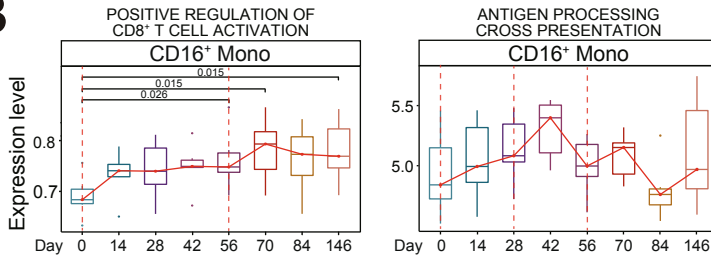

**C**

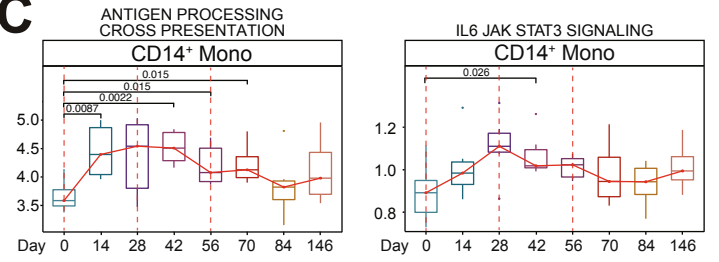

**D**

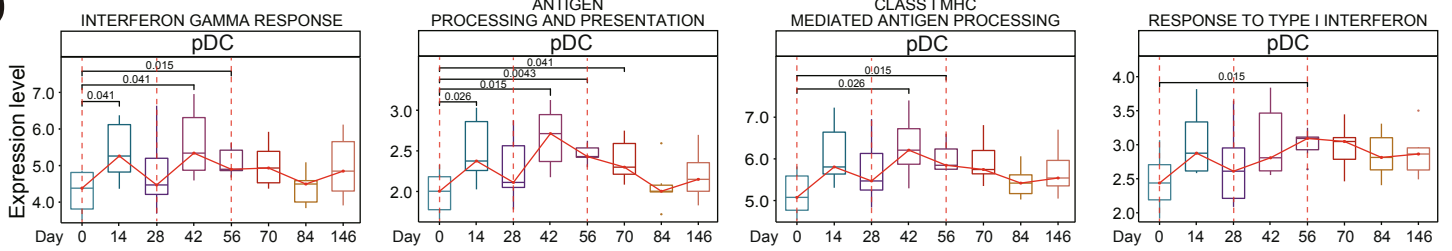

**E**

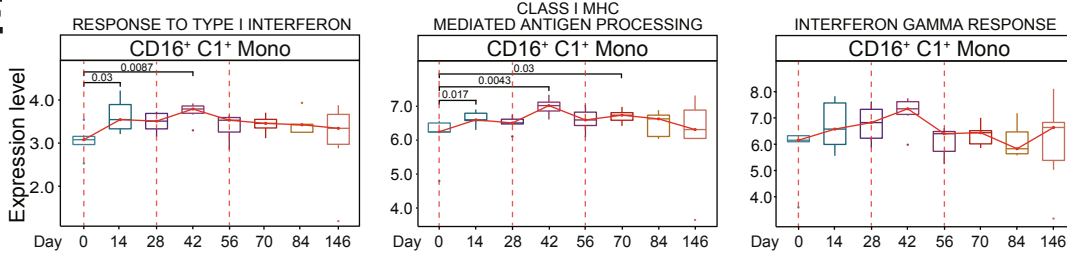

**F**

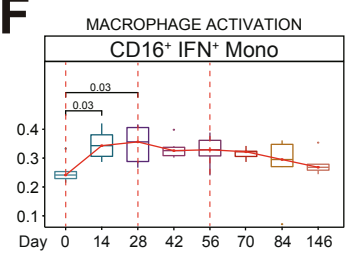

# Supplemental Figure 3

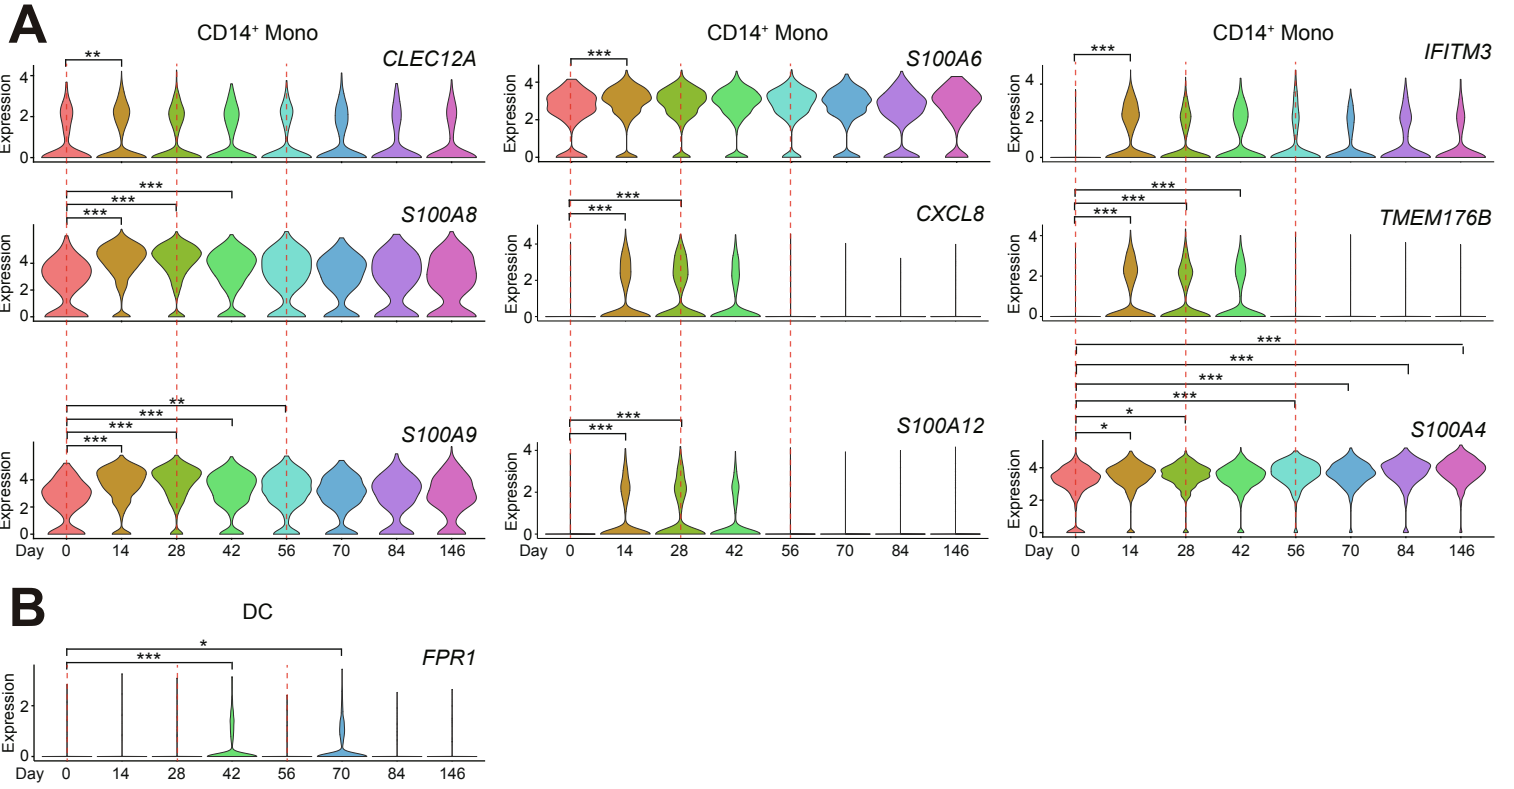

# Supplemental Figure 4

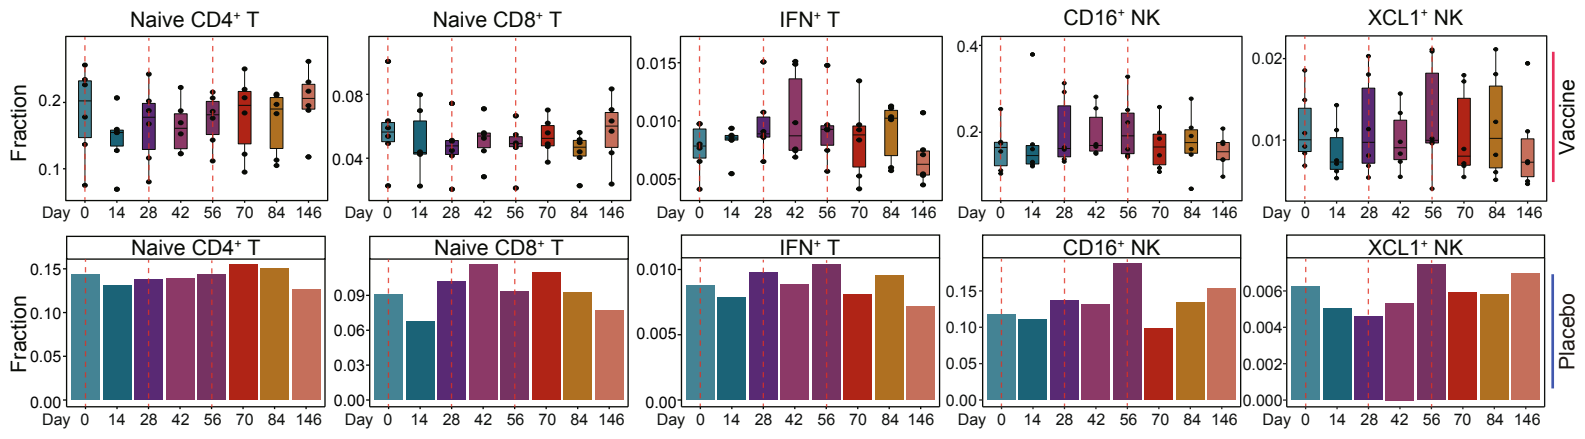

# Supplemental Figure 5

**A**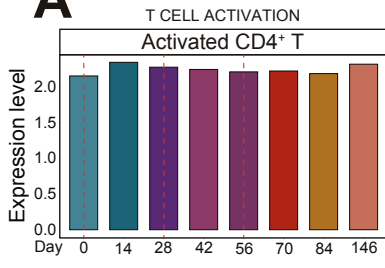**B**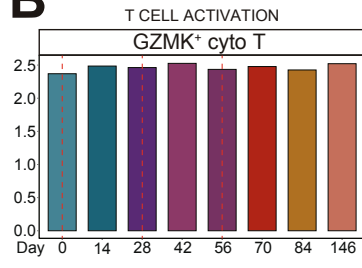**C**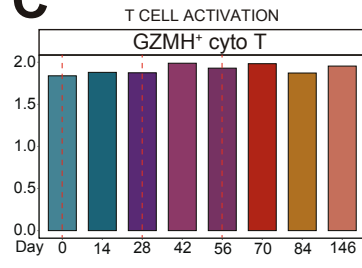**D**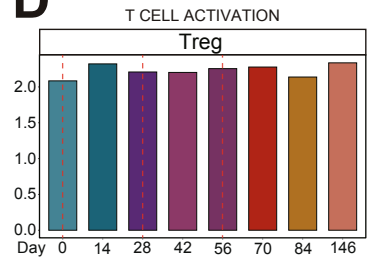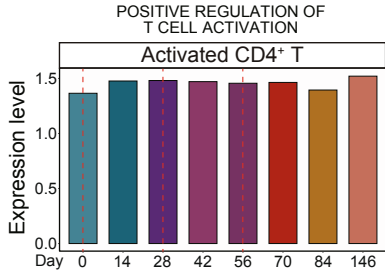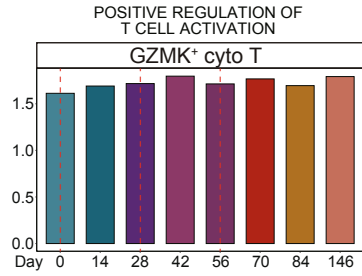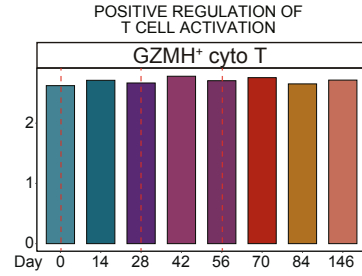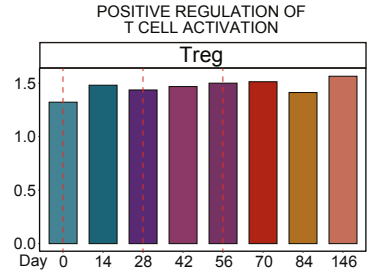

# Supplemental Figure 6

**A**

Activated CD4<sup>+</sup> T

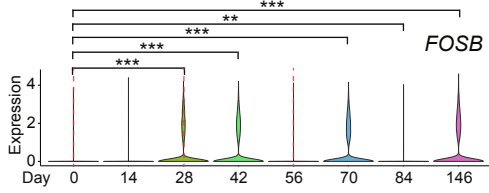

Activated CD4<sup>+</sup> T

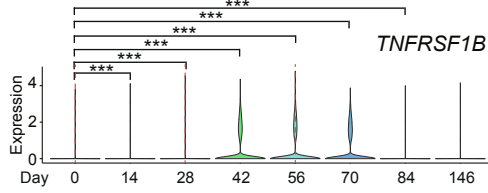

**B**

GZMK<sup>+</sup> cyto T

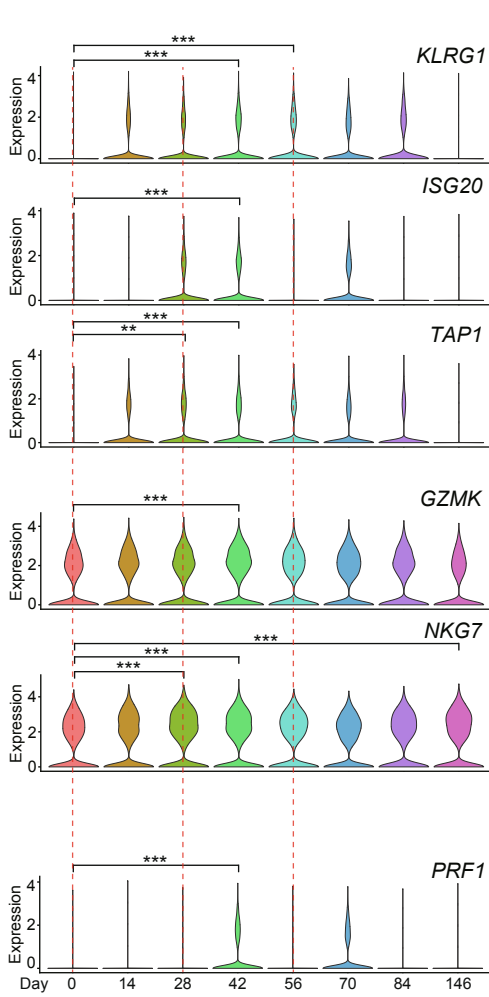

**C**

GZMH<sup>+</sup> cyto T

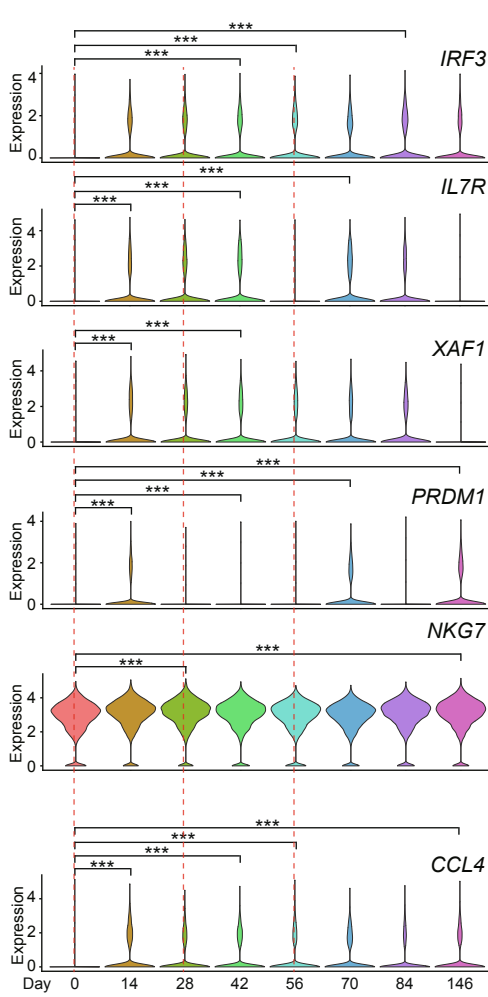

**D**

CD16<sup>+</sup> NK

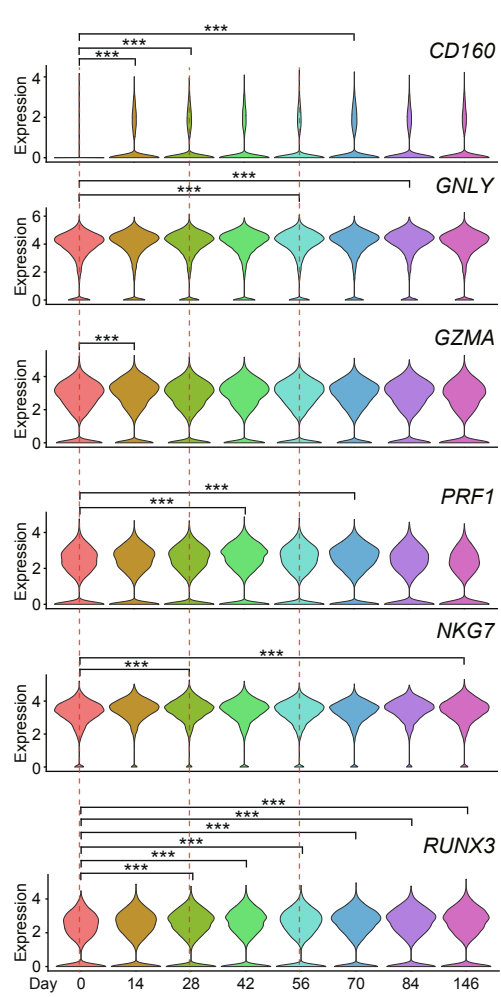

# Supplemental Figure 7

**A**

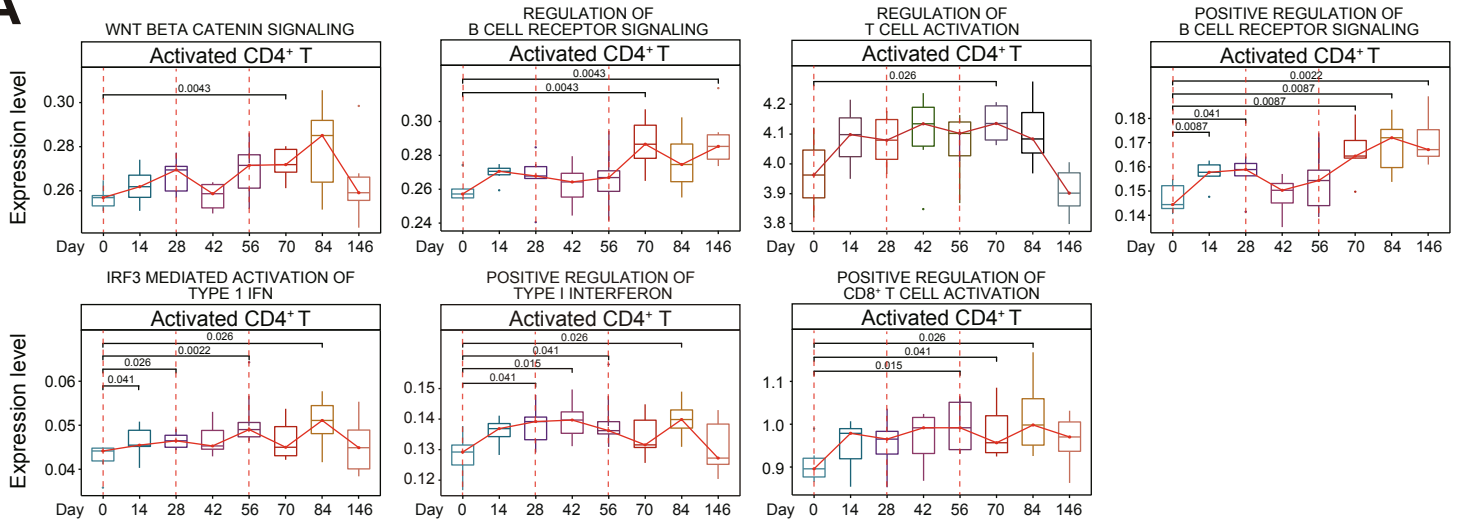

**B**

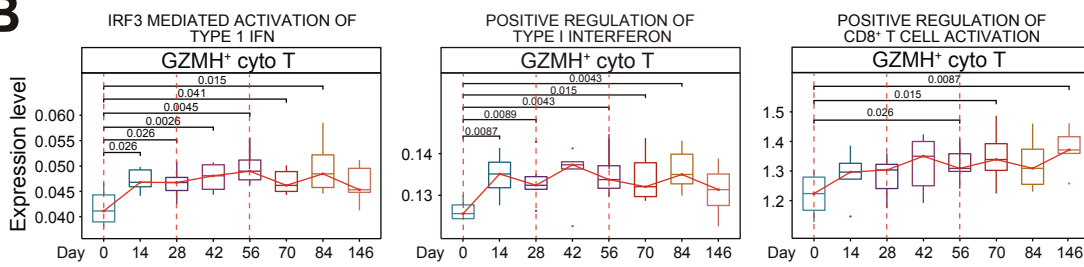

**C**

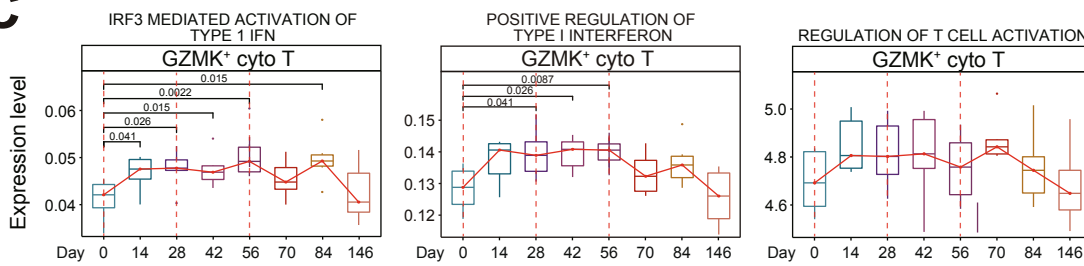

**D**

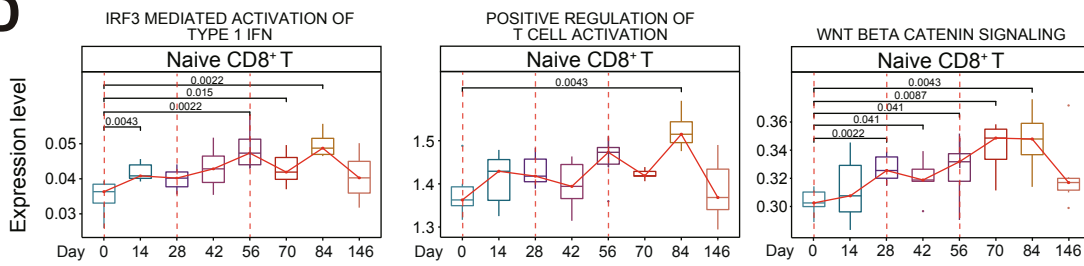

**E**

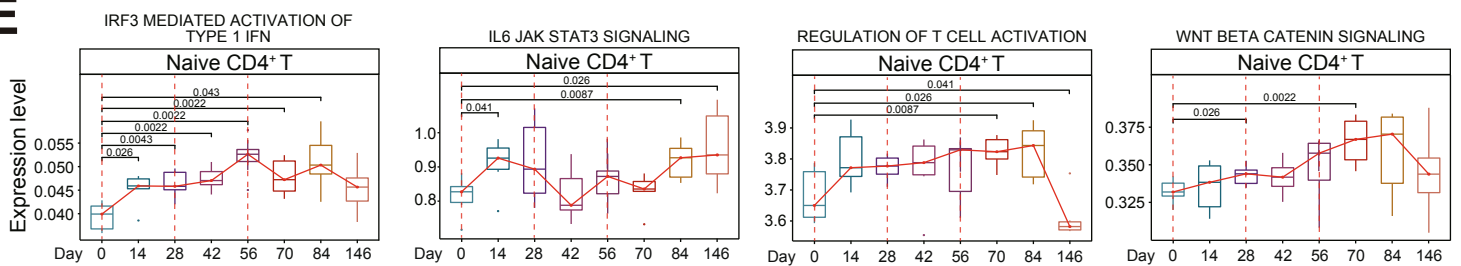

**F**

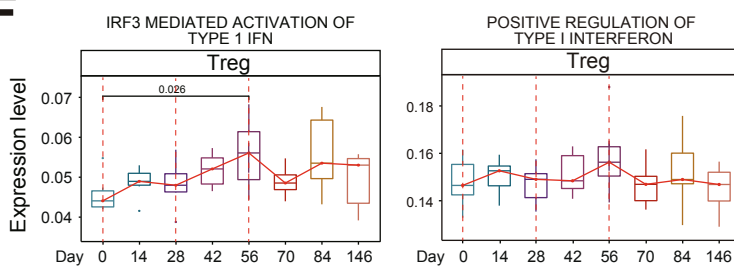



# Supplemental Figure 8

**A**

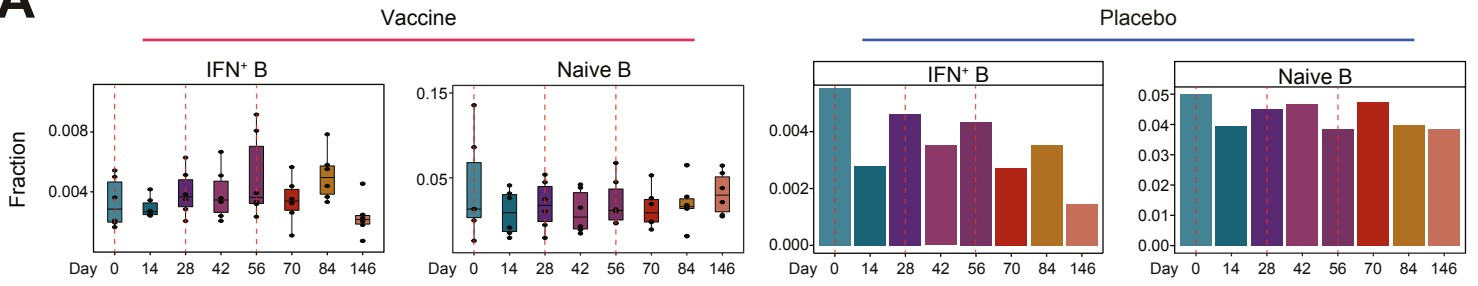

**B**

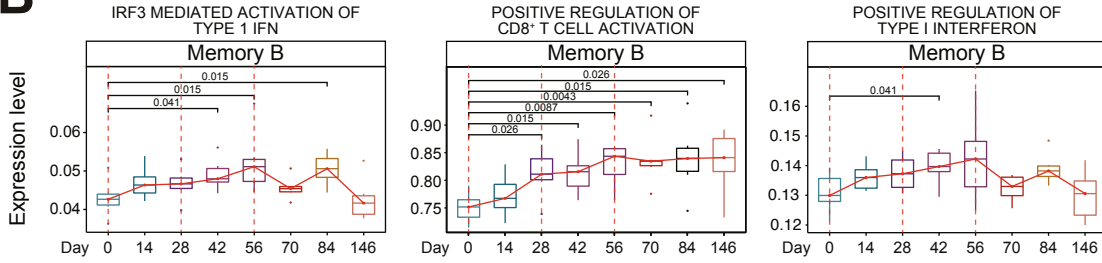

**C**

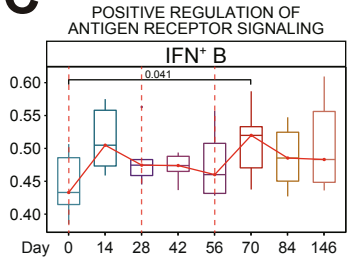

**D**

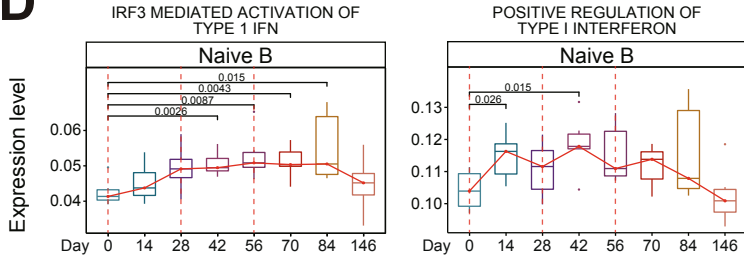

**E**

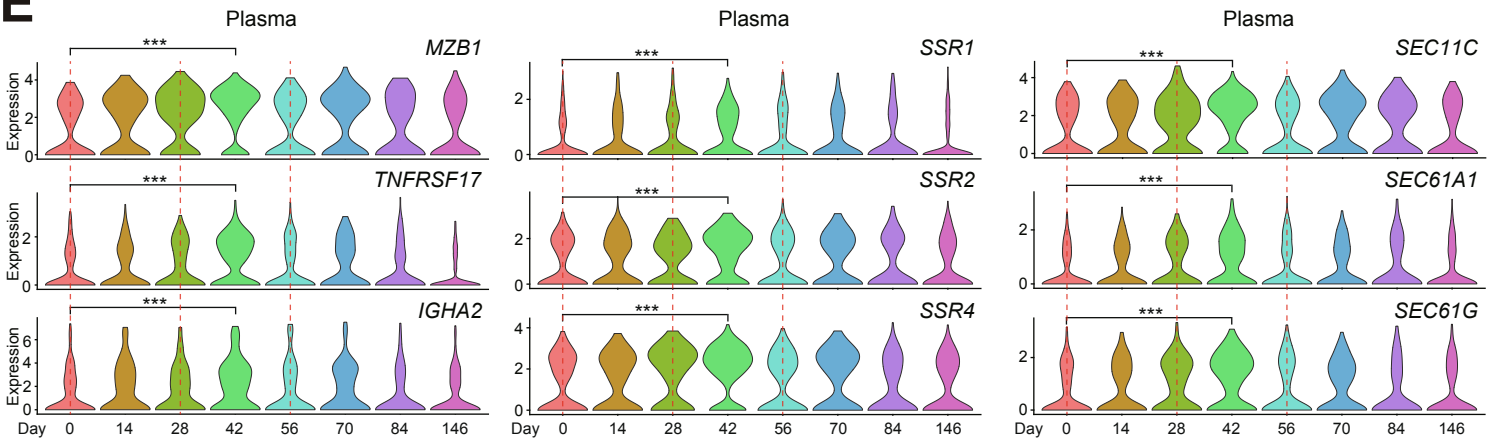

**F**

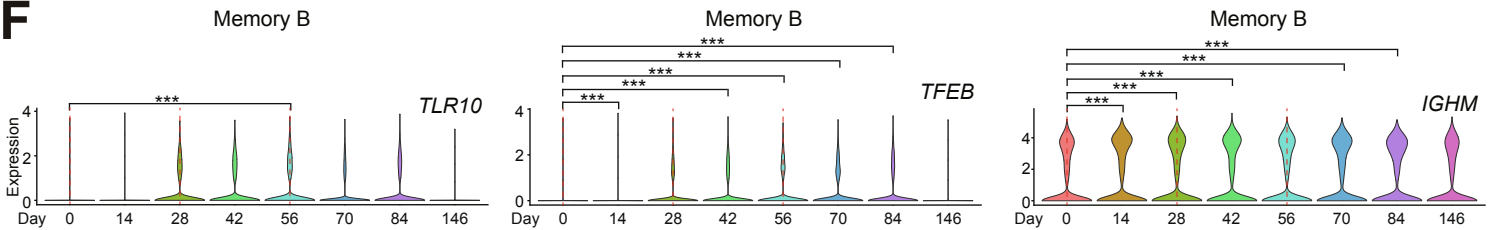

# Supplemental Figure 9

## A

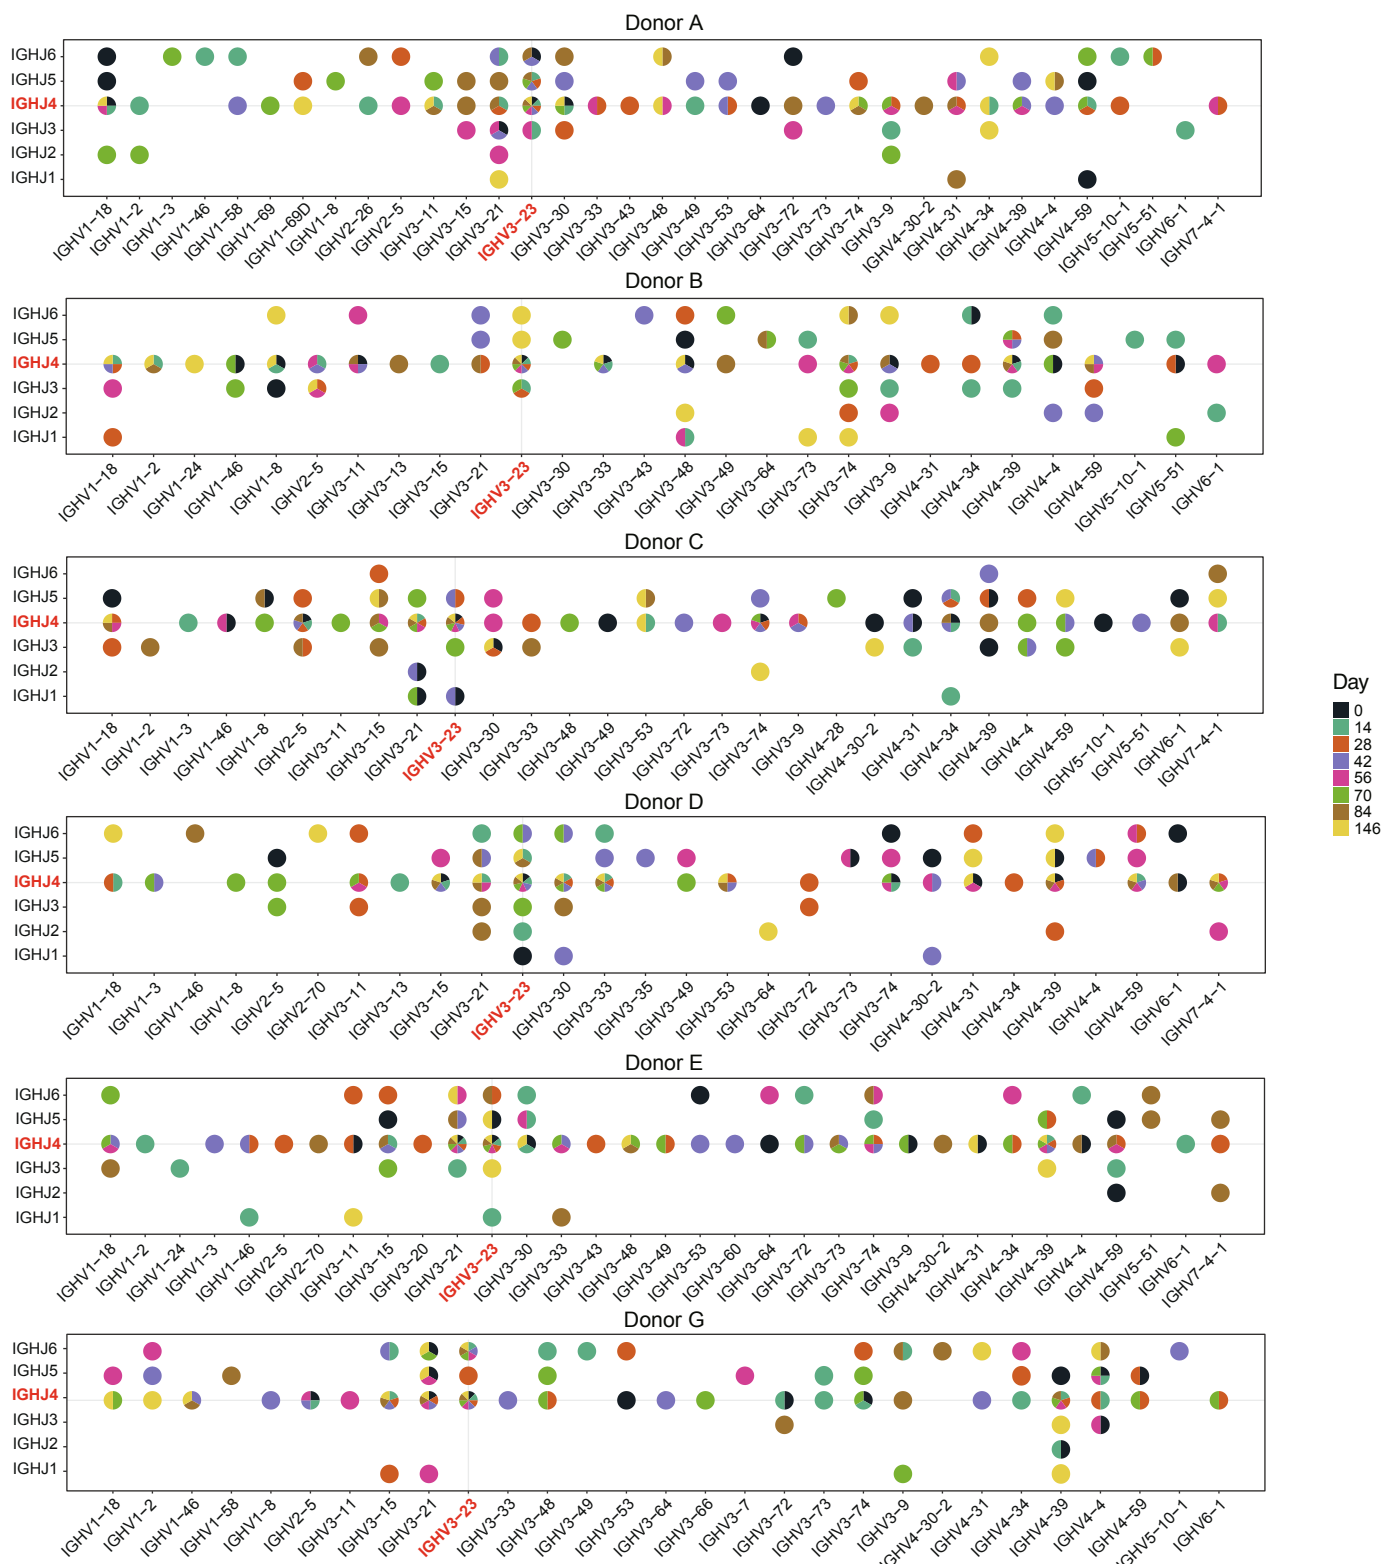

## B

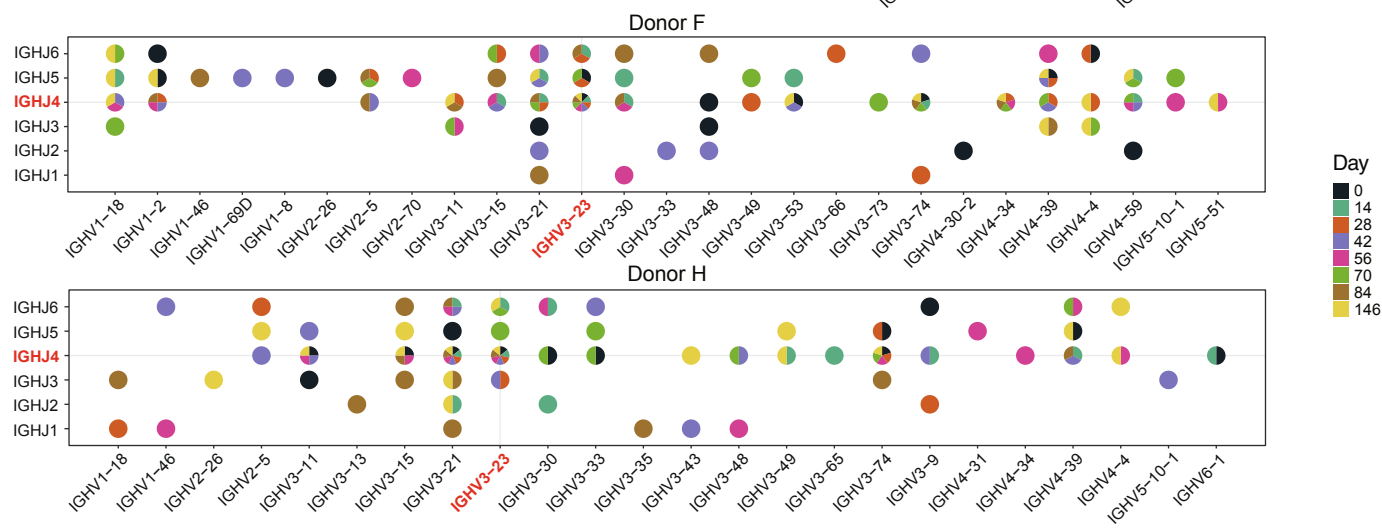

# Supplemental Figure 10

Day 0

Day 14

Day 28

Day 42

Day 56

Day 70

Day 84

Day 146

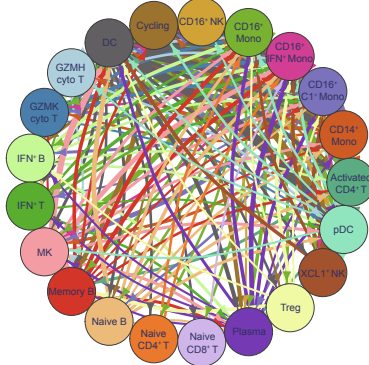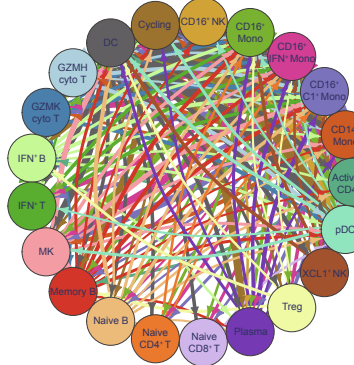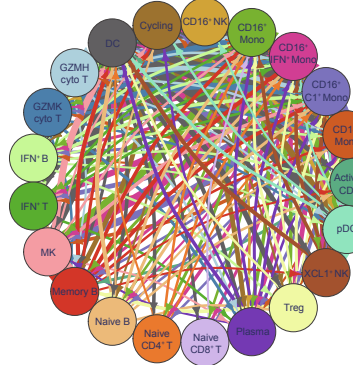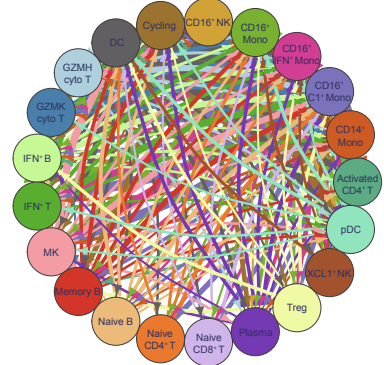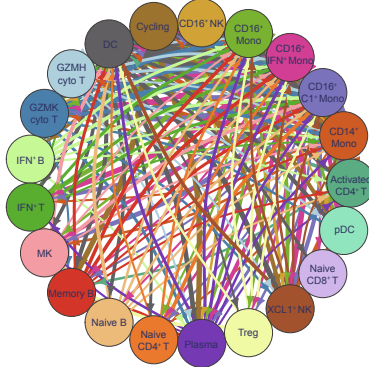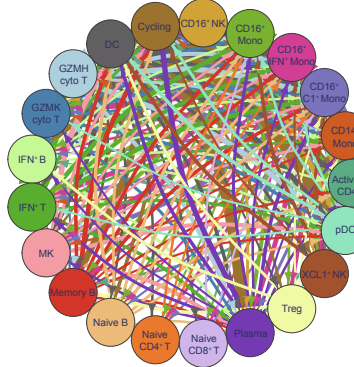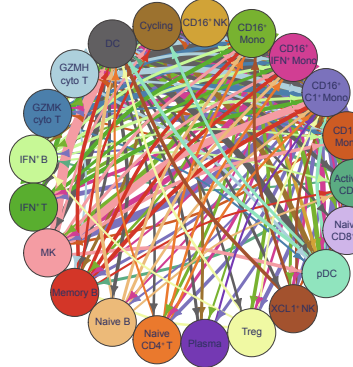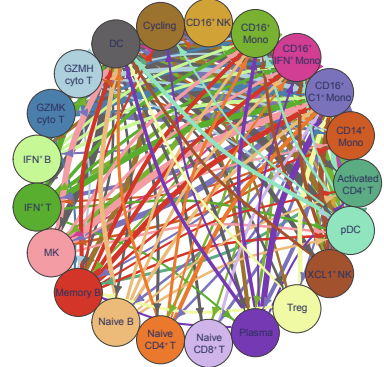

# Supplemental Figure 11

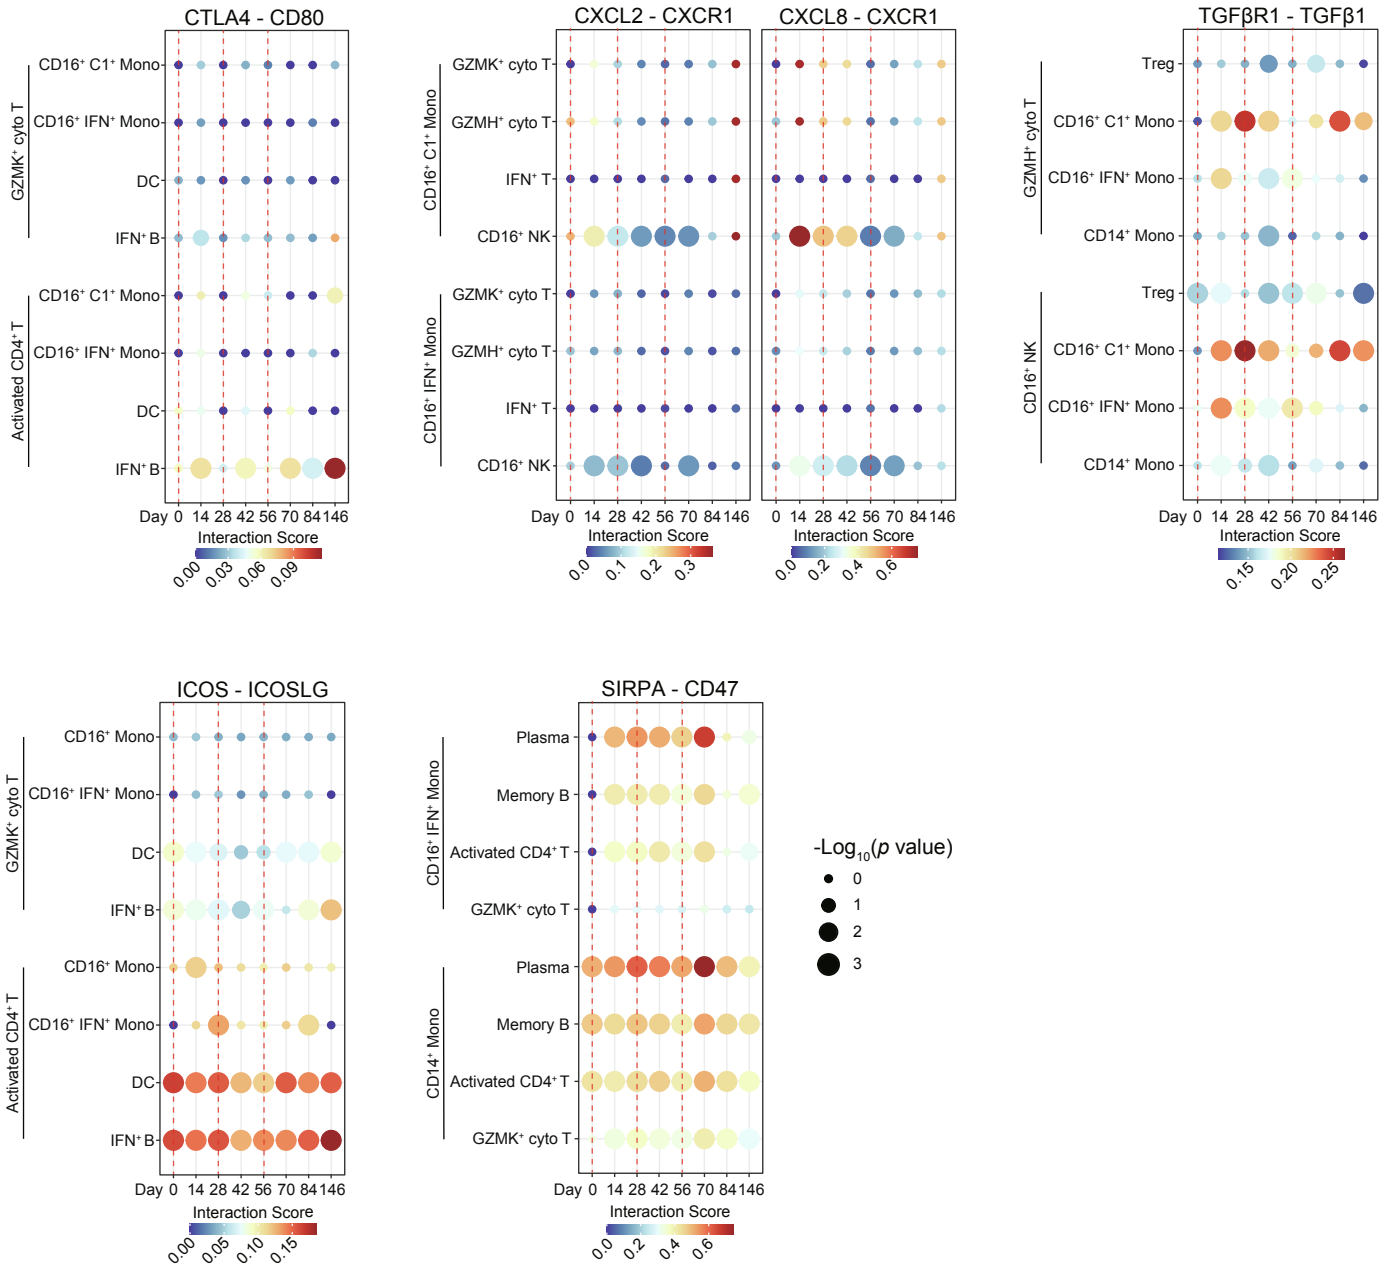

# Supplemental Figure 12

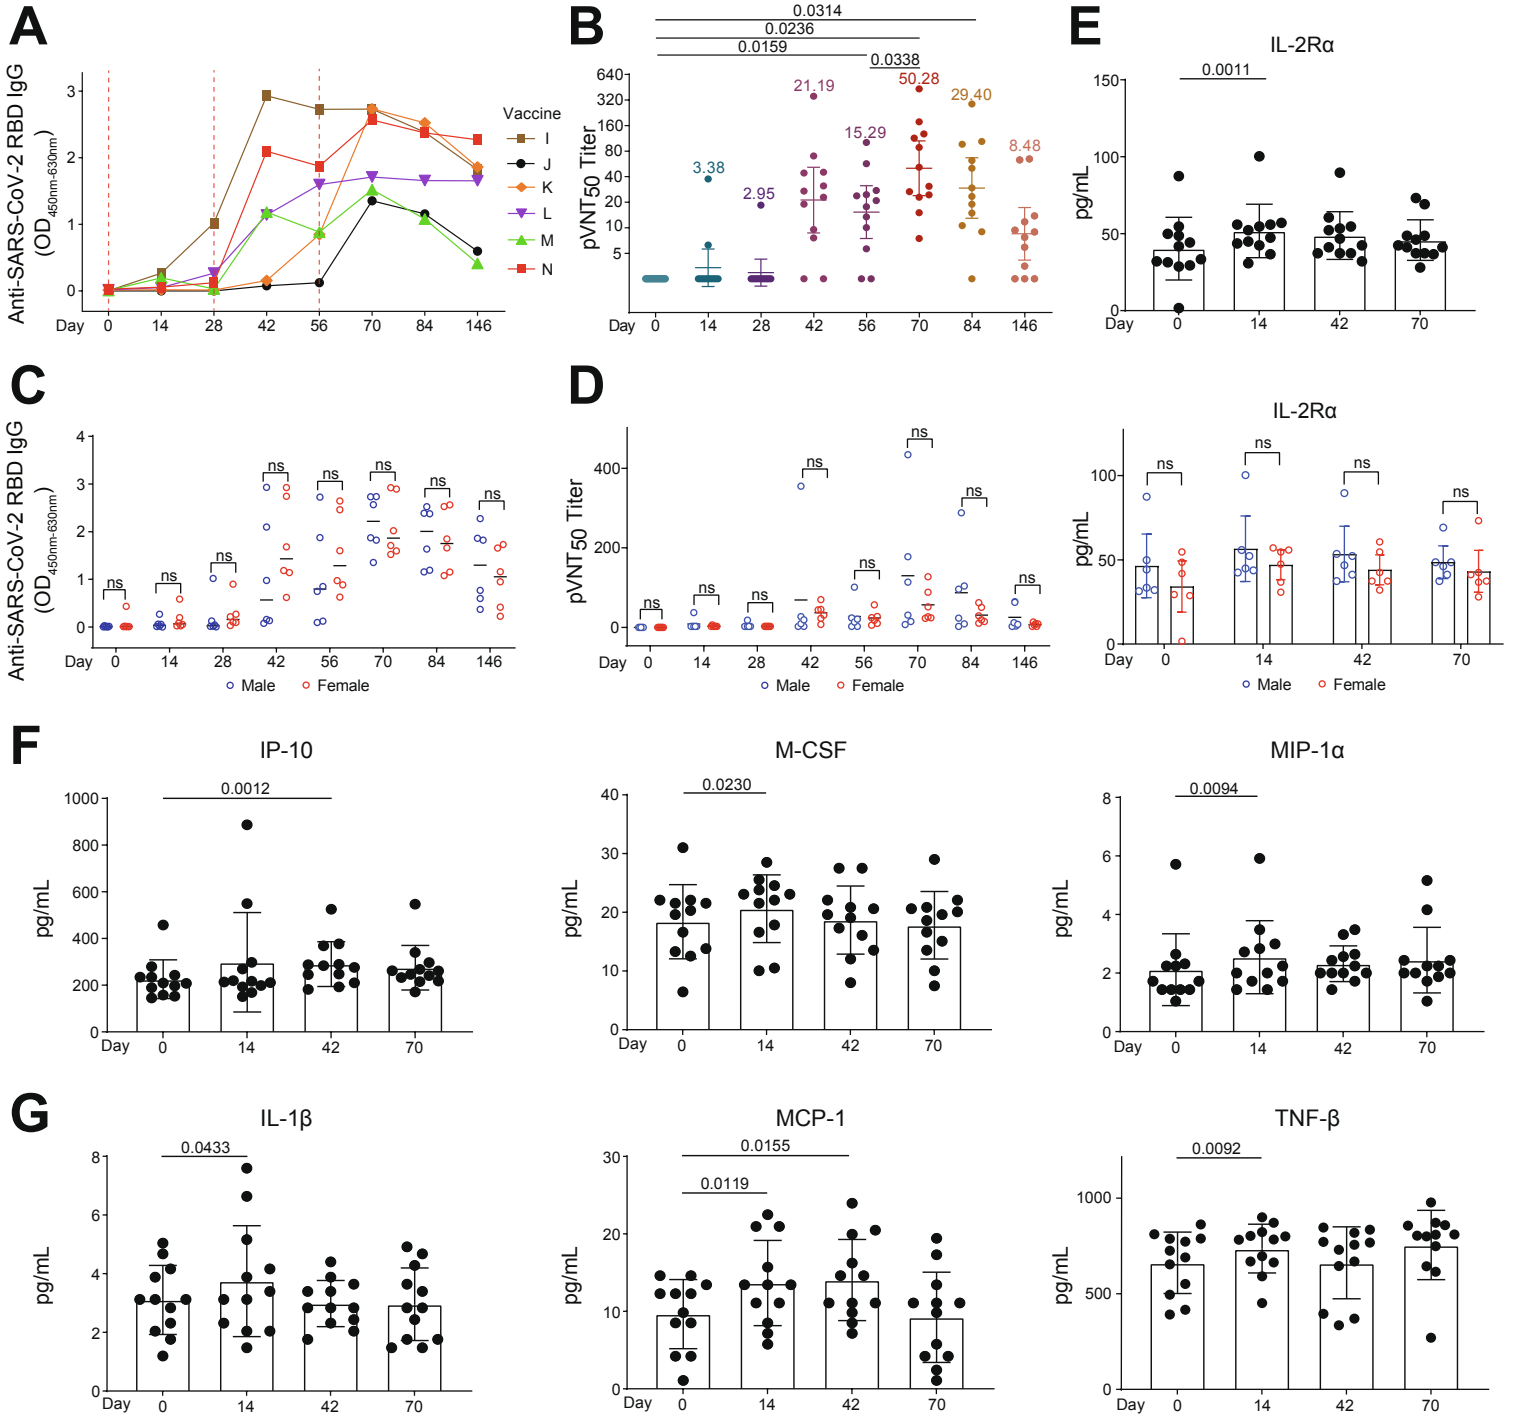

# Supplemental Figure 13

**A**

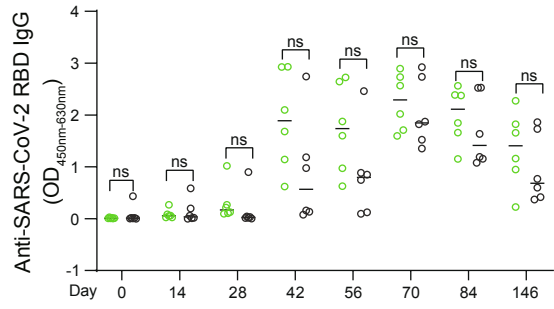

**B**

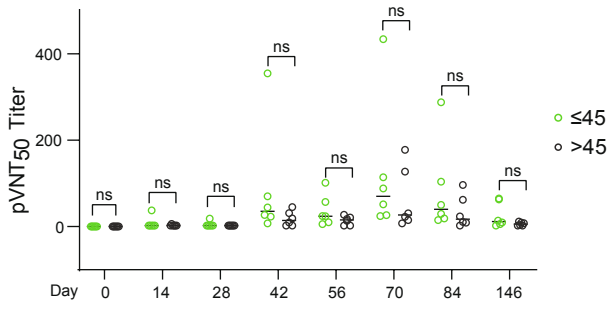

**C**

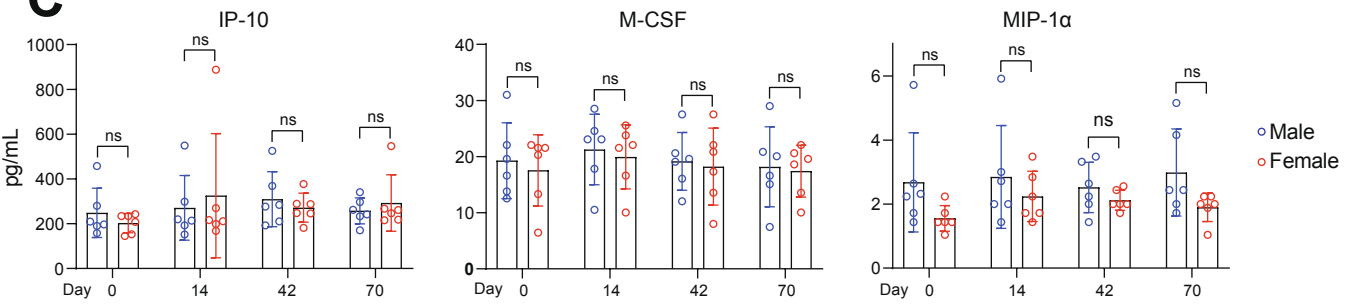

**D**

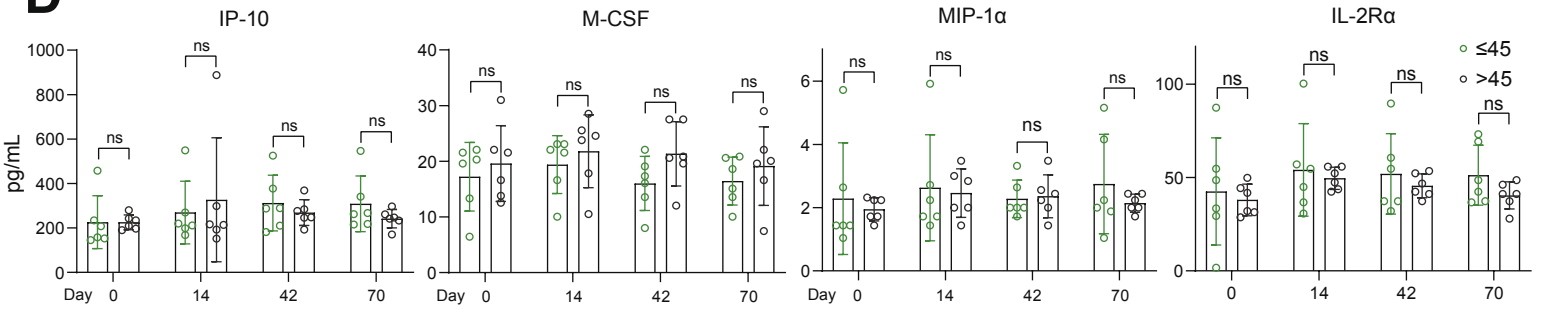

**E**

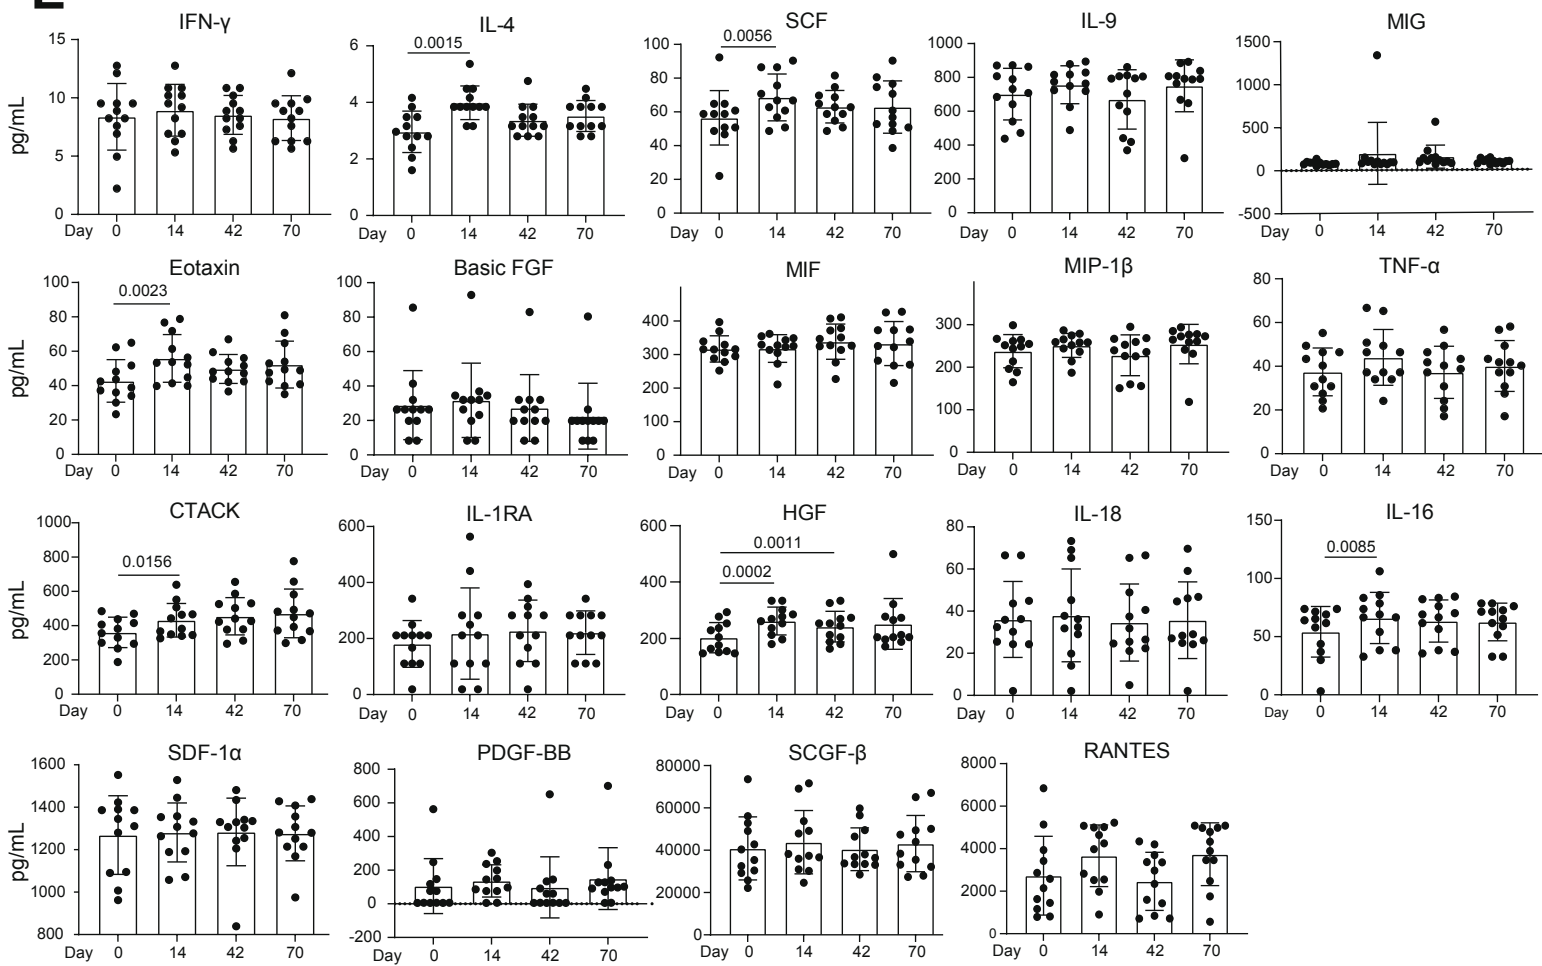

Supplement: mmc1.pdf [file mmc1.pdf]
